# Supplementary material
Source: PubMed Central journal article supplement (PMC4136075)

## Supplemental material

**Table S1.** Patient characteristics.

Pat, patient; GVHD, graft-versus-host disease; MDS, myelodysplastic syndrome; PTLD, post-transplant lymphoproliferative disorder; CML, chronic myeloid leukemia; Bu, busulphan; CMV, cytomegalovirus; ALL, acute lymphatic leukemia; CLL, chronic lymphatic leukemia; TBI, total body irradiation; ARDS, acute respiratory distress syndrome

| Pat. | Sex | Age (year) | Diagnosis | Onset GVHD grade $\geq$ II (days after HSCT) | Maximal grade of GVHD | Start posaconazole, days after HSCT | Dead (days after HSCT) | Signs of invasive fungal infection at autopsy | Cause of death              |
|------|-----|------------|-----------|----------------------------------------------|-----------------------|-------------------------------------|------------------------|-----------------------------------------------|-----------------------------|
| 1    | M   | 64         | MDS       | 30                                           | I-II                  | 65                                  | 70                     | Invasive mold infection in trachea            | PTLD                        |
| 2    | M   | 61         | CML       | 14                                           | IV                    | 182                                 | 186                    | No                                            | GVHD, CMV pneumonitis       |
| 3    | M   | 38         | ALL       | 24                                           | III                   | 35                                  | 66                     | No                                            | PTLD                        |
| 4    | M   | 65         | CLL       | 11                                           | II                    | 22                                  | 64                     | No                                            | ARDS, relapse CLL           |
| 5    | M   | 37         | Lymphoma  | 21                                           | IV                    | 24                                  | 210                    | No                                            | GVHD                        |
| 6    | M   | 40         | Lymphoma  | 91                                           | III-IV                | 92                                  | 111                    | No                                            | GVHD, CMV infection         |
| 7    | M   | 52         | Lymphoma  | 41                                           | III                   | 70                                  | 92                     | No                                            | Pneumonia, relapse lymphoma |

**Figure S1. Intra-individual pattern of posaconazole tissue distribution.** Each dot represents one patient. Tissue concentrations are shown in relation to the liver concentration which is set to 1. The lines represent median values.

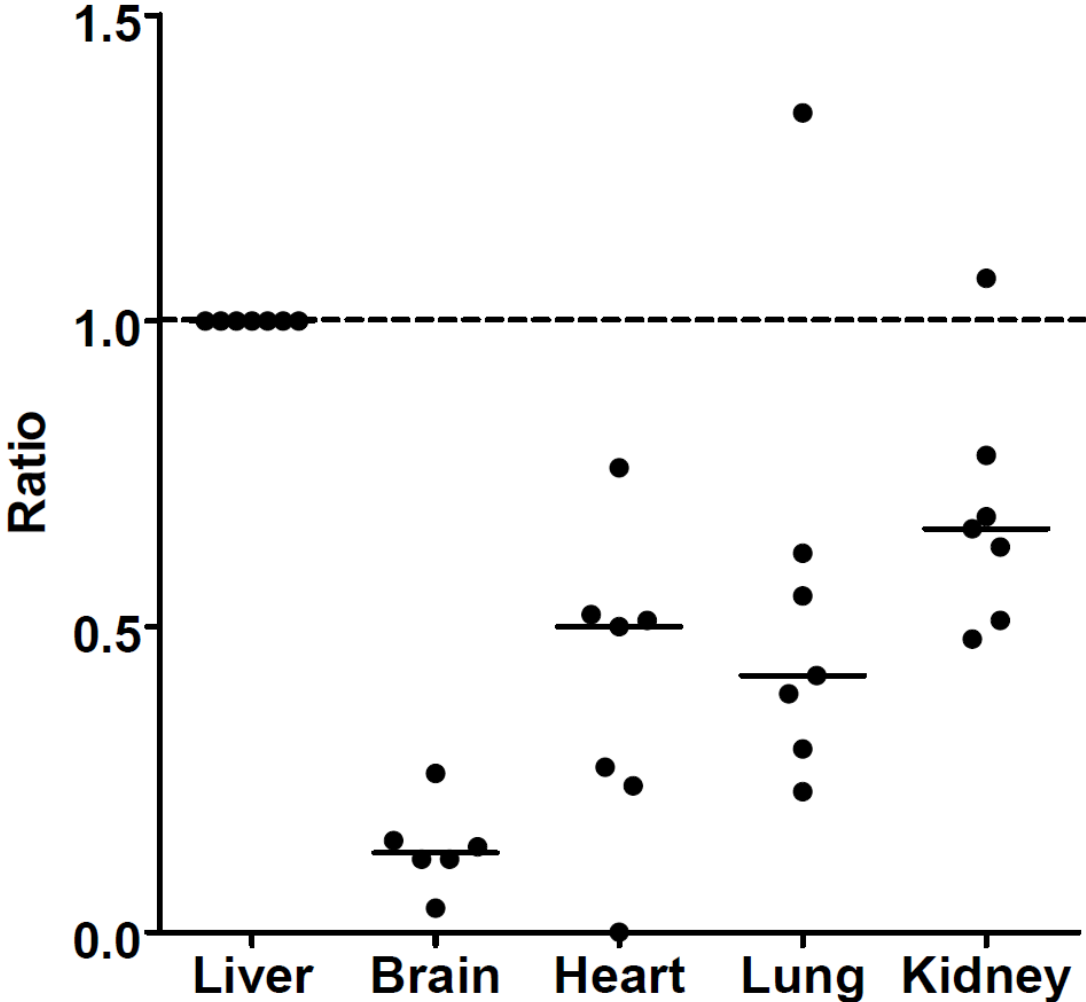

**Figure S2.** Relationship between concentrations in lung tissues and plasma.

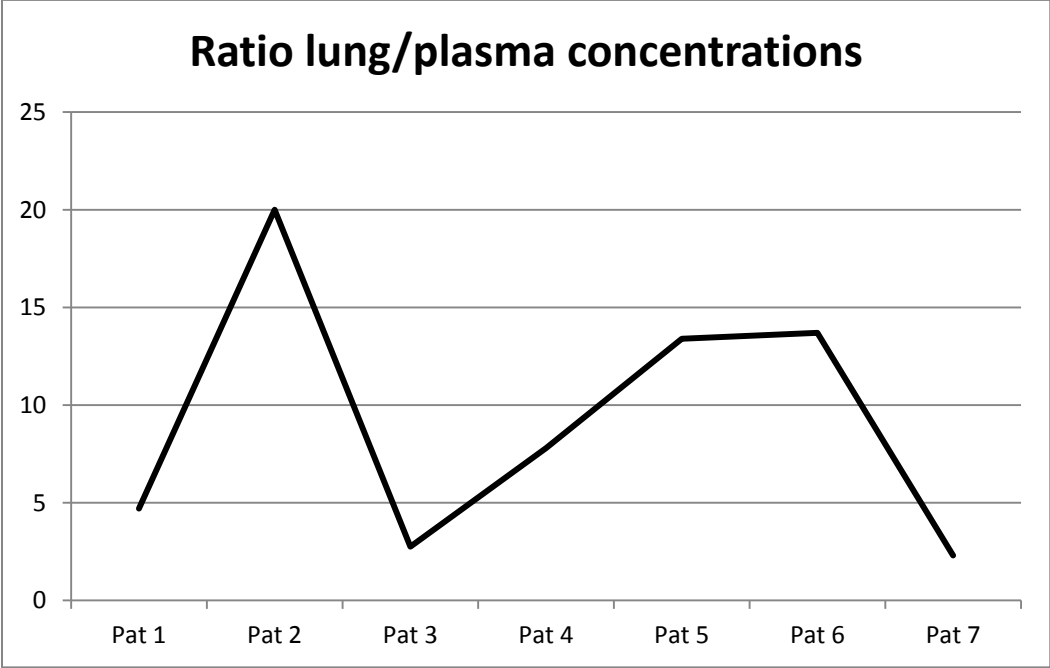

Supplement: AAC.03252-14_zac008143130so1.pdf [file AAC.03252-14_zac008143130so1.pdf]
